# Supplementary material
Source: Research Square preprint supplement (doi:10.21203/rs.3.rs-9643832/v1)
Supplement: Supplementary file 1 [file e56d6870a7dd9b587cdd6ec1.pdf]

**Supplementary Table 1. Voxel-wise spatial correlation between Parkinson's disease-related differences derived from multiparametric mapping and the six mitochondrial brain atlases features across the HMAT atlas-derived primary motor area mask.**

|                       | <b>r</b> | <b>Cohen's f<sup>2</sup></b> | <b>p<sub>uncorr</sub></b> | <b>p<sub>perm</sub></b> | <b>p<sub>FDR</sub></b> |
|-----------------------|----------|------------------------------|---------------------------|-------------------------|------------------------|
| <b>R1</b>             |          |                              |                           |                         |                        |
| CI                    | -0.180   | 0.033                        | <0.0001                   | 0.0002                  | 0.0003                 |
| CII                   | -0.249   | 0.066                        | <0.0001                   | 0.0002                  | 0.0002                 |
| CIV                   | -0.259   | 0.072                        | <0.0001                   | 0.0002                  | 0.0002                 |
| MitoD                 | -0.227   | 0.054                        | <0.0001                   | 0.0002                  | 0.0003                 |
| MRC                   | -0.280   | 0.085                        | <0.0001                   | 0.0002                  | 0.0003                 |
| TRC                   | -0.275   | 0.082                        | <0.0001                   | 0.0002                  | 0.0003                 |
| <b>R2*</b>            |          |                              |                           |                         |                        |
| CI                    | -0.027   | <0.001                       | <0.0001                   | 0.0002                  | 0.0003                 |
| CII                   | -0.048   | 0.002                        | <0.0001                   | 0.0002                  | 0.0003                 |
| CIV                   | -0.033   | 0.001                        | <0.0001                   | 0.0002                  | 0.0004                 |
| MitoD                 | -0.029   | <0.001                       | <0.0001                   | 0.0002                  | 0.0002                 |
| MRC                   | -0.019   | <0.001                       | <0.0001                   | 0.0002                  | 0.0003                 |
| TRC                   | -0.039   | 0.001                        | <0.0001                   | 0.0002                  | 0.0003                 |
| <b>Proton density</b> |          |                              |                           |                         |                        |
| CI                    | 0.205    | 0.044                        | <0.0001                   | 0.0002                  | 0.0003                 |
| CII                   | 0.245    | 0.064                        | <0.0001                   | 0.0002                  | 0.0003                 |
| CIV                   | 0.266    | 0.076                        | <0.0001                   | 0.0002                  | 0.0002                 |
| MitoD                 | 0.229    | 0.055                        | <0.0001                   | 0.0002                  | 0.0003                 |
| MRC                   | 0.318    | 0.112                        | <0.0001                   | 0.0002                  | 0.0002                 |
| TRC                   | 0.291    | 0.096                        | <0.0001                   | 0.0002                  | 0.0003                 |
| <b>MTsat</b>          |          |                              |                           |                         |                        |
| CI                    | -0.064   | 0.004                        | <0.0001                   | 0.0002                  | 0.0003                 |
| CII                   | -0.069   | 0.005                        | <0.0001                   | 0.0002                  | 0.0003                 |
| CIV                   | -0.082   | 0.007                        | <0.0001                   | 0.0002                  | 0.0003                 |
| MitoD                 | -0.038   | 0.001                        | <0.0001                   | 0.0002                  | 0.0003                 |
| MRC                   | -0.092   | 0.008                        | <0.0001                   | 0.0002                  | 0.0004                 |
| TRC                   | -0.084   | 0.007                        | <0.0001                   | 0.0002                  | 0.0003                 |

We assessed the group differences in R1, R2\*, proton density, and MTsat using t-maps containing PwPD > HCs values and six mitochondrial feature maps: CI, CII, CIV, MitoD, MRC, and TRC. After masking for finite values, n = 60,176 voxels were included in the analysis. For each type of analysis, we report nominal, permutation-derived, and false discovery rate (FDR)-adjusted p-values. CI, CII, CIV: mitochondrial electron transport chain protein complexes I, II, and IV. Cohen's f<sup>2</sup>: standardized effect size measure. HCs: healthy controls. MitoD: mitochondrial density. MTsat: magnetic transfer saturation. MRC: mitochondrial respiration capacity. PwPD: patients with Parkinson's disease. p<sub>FDR</sub>: false-discovery rate-adjusted p-value. p<sub>perm</sub>: non-parametric p-value derived from permutation testing. p<sub>uncorr</sub>: nominal p-value. r: correlation coefficient. R<sup>2</sup>: coefficient of determination. R1: longitudinal relaxation rate. R2\*: effective transverse relaxation rate. TRC: tissue respiration capacity.

**Supplementary Table 2. Voxel-wise spatial correlation between Parkinson's disease-related differences derived from multiparametric mapping and the six mitochondrial brain atlases features across the HMAT atlas-derived dorsal premotor cortex mask.**

|                       | <b>r</b> | <b>Cohen's f<sup>2</sup></b> | <b>p<sub>uncorr</sub></b> | <b>p<sub>perm</sub></b> | <b>p<sub>FDR</sub></b> |
|-----------------------|----------|------------------------------|---------------------------|-------------------------|------------------------|
| <b>R1</b>             |          |                              |                           |                         |                        |
| CI                    | -0.345   | 0.135                        | <0.0001                   | 0.0002                  | 0.0003                 |
| CII                   | -0.320   | 0.114                        | <0.0001                   | 0.0002                  | 0.0003                 |
| CIV                   | -0.377   | 0.165                        | <0.0001                   | 0.0002                  | 0.0003                 |
| MitoD                 | -0.362   | 0.151                        | <0.0001                   | 0.0002                  | 0.0003                 |
| MRC                   | -0.326   | 0.119                        | <0.0001                   | 0.0002                  | 0.0003                 |
| TRC                   | -0.362   | 0.154                        | <0.0001                   | 0.0002                  | 0.0003                 |
| <b>R2*</b>            |          |                              |                           |                         |                        |
| CI                    | -0.112   | 0.013                        | <0.0001                   | 0.0002                  | 0.0003                 |
| CII                   | -0.101   | 0.010                        | <0.0001                   | 0.0002                  | 0.0003                 |
| CIV                   | -0.123   | 0.015                        | <0.0001                   | 0.0002                  | 0.0004                 |
| MitoD                 | -0.131   | 0.017                        | <0.0001                   | 0.0002                  | 0.0003                 |
| MRC                   | -0.077   | 0.006                        | <0.0001                   | 0.0002                  | 0.0003                 |
| TRC                   | -0.107   | 0.012                        | <0.0001                   | 0.0002                  | 0.0003                 |
| <b>Proton density</b> |          |                              |                           |                         |                        |
| CI                    | 0.217    | 0.049                        | <0.0001                   | 0.0002                  | 0.0003                 |
| CII                   | 0.201    | 0.042                        | <0.0001                   | 0.0002                  | 0.0003                 |
| CIV                   | 0.245    | 0.064                        | <0.0001                   | 0.0002                  | 0.0002                 |
| MitoD                 | 0.193    | 0.039                        | <0.0001                   | 0.0002                  | 0.0003                 |
| MRC                   | 0.290    | 0.092                        | <0.0001                   | 0.0002                  | 0.0002                 |
| TRC                   | 0.261    | 0.073                        | <0.0001                   | 0.0002                  | 0.0003                 |
| <b>MTsat</b>          |          |                              |                           |                         |                        |
| CI                    | -0.123   | 0.015                        | <0.0001                   | 0.0002                  | 0.0003                 |
| CII                   | -0.092   | 0.008                        | <0.0001                   | 0.0002                  | 0.0003                 |
| CIV                   | -0.125   | 0.016                        | <0.0001                   | 0.0002                  | 0.0003                 |
| MitoD                 | -0.111   | 0.012                        | <0.0001                   | 0.0002                  | 0.0003                 |
| MRC                   | -0.095   | 0.009                        | <0.0001                   | 0.0002                  | 0.0004                 |
| TRC                   | -0.113   | 0.013                        | <0.0001                   | 0.0002                  | 0.0003                 |

We assessed the group differences in R1, R2\*, proton density, and MTsat using t-maps containing PwPD > HCs values and six mitochondrial feature maps: CI, CII, CIV, MitoD, MRC, and TRC. After masking for finite values, n = 52,792 voxels were included in the analysis. For each type of analysis, we report nominal, permutation-derived, and false discovery rate (FDR)-adjusted p-values. CI, CII, CIV: mitochondrial electron transport chain protein complexes I, II, and IV. Cohen's f<sup>2</sup>: standardized effect size measure. HCs: healthy controls. MitoD: mitochondrial density. MTsat: magnetic transfer saturation. MRC: mitochondrial respiration capacity. PwPD: patients with Parkinson's disease. p<sub>FDR</sub>: false-discovery rate-adjusted p-value. p<sub>perm</sub>: non-parametric p-value derived from permutation testing. p<sub>uncorr</sub>: nominal p-value. r: correlation coefficient. R<sup>2</sup>: coefficient of determination. R1: longitudinal relaxation rate. R2\*: effective transverse relaxation rate. TRC: tissue respiration capacity.

**Supplementary Table 3. Voxel-wise spatial correlation between Parkinson's disease-related differences derived from multiparametric mapping and the six mitochondrial brain atlases features across the HMAT atlas-derived presupplementary motor cortex mask.**

|                       | <b>r</b> | <b>Cohen's f<sup>2</sup></b> | <b>p<sub>uncorr</sub></b> | <b>p<sub>perm</sub></b> | <b>p<sub>FDR</sub></b> |
|-----------------------|----------|------------------------------|---------------------------|-------------------------|------------------------|
| <b>R1</b>             |          |                              |                           |                         |                        |
| CI                    | -0.142   | 0.020                        | <0.0001                   | 0.0002                  | 0.0003                 |
| CII                   | -0.130   | 0.017                        | <0.0001                   | 0.0002                  | 0.0003                 |
| CIV                   | -0.209   | 0.046                        | <0.0001                   | 0.0002                  | 0.0002                 |
| MitoD                 | -0.222   | 0.052                        | <0.0001                   | 0.0002                  | 0.0003                 |
| MRC                   | -0.119   | 0.014                        | <0.0001                   | 0.0002                  | 0.0003                 |
| TRC                   | -0.196   | 0.040                        | <0.0001                   | 0.0002                  | 0.0003                 |
| <b>R2*</b>            |          |                              |                           |                         |                        |
| CI                    | -0.104   | 0.011                        | <0.0001                   | 0.0002                  | 0.0003                 |
| CII                   | -0.101   | 0.010                        | <0.0001                   | 0.0002                  | 0.0003                 |
| CIV                   | -0.160   | 0.026                        | <0.0001                   | 0.0002                  | 0.0004                 |
| MitoD                 | -0.201   | 0.042                        | <0.0001                   | 0.0002                  | 0.0002                 |
| MRC                   | -0.076   | 0.006                        | <0.0001                   | 0.0002                  | 0.0004                 |
| TRC                   | -0.145   | 0.021                        | <0.0001                   | 0.0002                  | 0.0003                 |
| <b>Proton density</b> |          |                              |                           |                         |                        |
| CI                    | 0.013    | <0.001                       | 0.0747                    | 0.3631                  | 0.3994                 |
| CII                   | -0.037   | 0.001                        | <0.0001                   | 0.0002                  | 0.0003                 |
| CIV                   | -0.076   | 0.006                        | <0.0001                   | 0.0002                  | 0.0002                 |
| MitoD                 | -0.038   | 0.001                        | <0.0001                   | 0.0002                  | 0.0004                 |
| MRC                   | 0.031    | 0.001                        | <0.0001                   | 0.0002                  | 0.0002                 |
| TRC                   | -0.062   | 0.004                        | <0.0001                   | 0.0002                  | 0.0002                 |
| <b>MTsat</b>          |          |                              |                           |                         |                        |
| CI                    | -0.053   | 0.003                        | <0.0001                   | 0.0002                  | 0.0003                 |
| CII                   | -0.195   | 0.039                        | <0.0001                   | 0.0002                  | 0.0003                 |
| CIV                   | -0.162   | 0.027                        | <0.0001                   | 0.0002                  | 0.0003                 |
| MitoD                 | -0.163   | 0.027                        | <0.0001                   | 0.0002                  | 0.0003                 |
| MRC                   | -0.198   | 0.040                        | <0.0001                   | 0.0002                  | 0.0004                 |
| TRC                   | -0.162   | 0.027                        | <0.0001                   | 0.0002                  | 0.0003                 |

We assessed the group differences in R1, R2\*, proton density, and MTsat using t-maps containing PwPD > HCs values and six mitochondrial feature maps: CI, CII, CIV, MitoD, MRC, and TRC. After masking for finite values, n = 17,468 voxels were included in the analysis. For each type of analysis, we report nominal, permutation-derived, and false discovery rate (FDR)-adjusted p-values. CI, CII, CIV: mitochondrial electron transport chain protein complexes I, II, and IV. Cohen's f<sup>2</sup>: standardized effect size measure. HCs: healthy controls. MitoD: mitochondrial density. MTsat: magnetic transfer saturation. MRC: mitochondrial respiration capacity. PwPD: patients with Parkinson's disease. p<sub>FDR</sub>: false-discovery rate-adjusted p-value. p<sub>perm</sub>: non-parametric p-value derived from permutation testing. p<sub>uncorr</sub>: nominal p-value. r: correlation coefficient. R<sup>2</sup>: coefficient of determination. R1: longitudinal relaxation rate. R2\*: effective transverse relaxation rate. TRC: tissue respiration capacity.

**Supplementary Table 4. Voxel-wise spatial correlation between Parkinson's disease-related differences derived from multiparametric mapping and the six mitochondrial brain atlases features across the HMAT atlas-derived primary somatosensory cortex mask.**

|                       | <b>r</b> | <b>Cohen's f<sup>2</sup></b> | <b>p<sub>uncorr</sub></b> | <b>p<sub>perm</sub></b> | <b>p<sub>FDR</sub></b> |
|-----------------------|----------|------------------------------|---------------------------|-------------------------|------------------------|
| <b>R1</b>             |          |                              |                           |                         |                        |
| CI                    | -0.083   | 0.007                        | <0.0001                   | 0.0002                  | 0.0003                 |
| CII                   | -0.038   | 0.001                        | <0.0001                   | 0.0002                  | 0.0003                 |
| CIV                   | -0.096   | 0.009                        | <0.0001                   | 0.0002                  | 0.0002                 |
| MitoD                 | -0.050   | 0.002                        | <0.0001                   | 0.0002                  | 0.0003                 |
| MRC                   | -0.087   | 0.007                        | <0.0001                   | 0.0002                  | 0.0003                 |
| TRC                   | -0.090   | 0.008                        | <0.0001                   | 0.0002                  | 0.0003                 |
| <b>R2*</b>            |          |                              |                           |                         |                        |
| CI                    | 0.006    | <0.001                       | 0.2134                    | 0.7552                  | 0.9230                 |
| CII                   | 0.100    | 0.010                        | <0.0001                   | 0.0002                  | 0.0003                 |
| CIV                   | 0.089    | 0.008                        | <0.0001                   | 0.0002                  | 0.0004                 |
| MitoD                 | 0.101    | 0.010                        | <0.0001                   | 0.0002                  | 0.0002                 |
| MRC                   | 0.082    | 0.007                        | <0.0001                   | 0.0002                  | 0.0003                 |
| TRC                   | 0.092    | 0.009                        | <0.0001                   | 0.0002                  | 0.0003                 |
| <b>Proton density</b> |          |                              |                           |                         |                        |
| CI                    | 0.124    | 0.016                        | <0.0001                   | 0.0002                  | 0.0003                 |
| CII                   | 0.177    | 0.032                        | <0.0001                   | 0.0002                  | 0.0003                 |
| CIV                   | 0.206    | 0.044                        | <0.0001                   | 0.0002                  | 0.0002                 |
| MitoD                 | 0.135    | 0.018                        | <0.0001                   | 0.0002                  | 0.0003                 |
| MRC                   | 0.243    | 0.063                        | <0.0001                   | 0.0002                  | 0.0002                 |
| TRC                   | 0.223    | 0.052                        | <0.0001                   | 0.0002                  | 0.0003                 |
| <b>MTsat</b>          |          |                              |                           |                         |                        |
| CI                    | 0.031    | <0.001                       | <0.0001                   | 0.0002                  | 0.0003                 |
| CII                   | 0.159    | 0.026                        | <0.0001                   | 0.0002                  | 0.0003                 |
| CIV                   | 0.116    | 0.014                        | <0.0001                   | 0.0002                  | 0.0003                 |
| MitoD                 | 0.144    | 0.021                        | <0.0001                   | 0.0002                  | 0.0003                 |
| MRC                   | 0.136    | 0.019                        | <0.0001                   | 0.0002                  | 0.0004                 |
| TRC                   | 0.135    | 0.018                        | <0.0001                   | 0.0002                  | 0.0003                 |

We assessed the group differences in R1, R2\*, proton density, and MTsat using t-maps containing PwPD > HCs values and six mitochondrial feature maps: CI, CII, CIV, MitoD, MRC, and TRC. After masking for finite values, n = 34,304 voxels were included in the analysis. For each type of analysis, we report nominal, permutation-derived, and false discovery rate (FDR)-adjusted p-values. CI, CII, CIV: mitochondrial electron transport chain protein complexes I, II, and IV. Cohen's f<sup>2</sup>: standardized effect size measure. HCs: healthy controls. MitoD: mitochondrial density. MTsat: magnetic transfer saturation. MRC: mitochondrial respiration capacity. PwPD: patients with Parkinson's disease. p<sub>FDR</sub>: false-discovery rate-adjusted p-value. p<sub>perm</sub>: non-parametric p-value derived from permutation testing. p<sub>uncorr</sub>: nominal p-value. r: correlation coefficient. R<sup>2</sup>: coefficient of determination. R1: longitudinal relaxation rate. R2\*: effective transverse relaxation rate. TRC: tissue respiration capacity.

**Supplementary Table 5. Voxel-wise spatial correlation between Parkinson's disease-related differences derived from multiparametric mapping and the six mitochondrial brain atlases features across the HMAT atlas-derived supplementary motor cortex mask.**

|                       | <b>r</b> | <b>Cohen's f<sup>2</sup></b> | <b>p<sub>uncorr</sub></b> | <b>p<sub>perm</sub></b> | <b>p<sub>FDR</sub></b> |
|-----------------------|----------|------------------------------|---------------------------|-------------------------|------------------------|
| <b>R1</b>             |          |                              |                           |                         |                        |
| CI                    | <0.001   | <0.001                       | 0.9936                    | 1.0000                  | 1.0000                 |
| CII                   | 0.070    | 0.005                        | <0.0001                   | 0.0002                  | 0.0003                 |
| CIV                   | -0.060   | 0.004                        | <0.0001                   | 0.0002                  | 0.0002                 |
| MitoD                 | -0.016   | <0.001                       | 0.0179                    | 0.1002                  | 0.1225                 |
| MRC                   | 0.041    | 0.002                        | <0.0001                   | 0.0002                  | 0.0003                 |
| TRC                   | -0.045   | 0.002                        | <0.0001                   | 0.0002                  | 0.0003                 |
| <b>R2*</b>            |          |                              |                           |                         |                        |
| CI                    | -0.028   | <0.001                       | <0.0001                   | 0.0002                  | 0.0003                 |
| CII                   | 0.070    | 0.005                        | <0.0001                   | 0.0002                  | 0.0003                 |
| CIV                   | -0.059   | 0.003                        | <0.0001                   | 0.0002                  | 0.0004                 |
| MitoD                 | -0.054   | 0.003                        | <0.0001                   | 0.0002                  | 0.0002                 |
| MRC                   | 0.084    | 0.007                        | <0.0001                   | 0.0002                  | 0.0003                 |
| TRC                   | -0.037   | 0.001                        | <0.0001                   | 0.0002                  | 0.0003                 |
| <b>Proton density</b> |          |                              |                           |                         |                        |
| CI                    | 0.180    | 0.034                        | <0.0001                   | 0.0002                  | 0.0003                 |
| CII                   | 0.108    | 0.012                        | <0.0001                   | 0.0002                  | 0.0003                 |
| CIV                   | 0.141    | 0.020                        | <0.0001                   | 0.0002                  | 0.0002                 |
| MitoD                 | 0.132    | 0.017                        | <0.0001                   | 0.0002                  | 0.0003                 |
| MRC                   | 0.226    | 0.051                        | <0.0001                   | 0.0002                  | 0.0002                 |
| TRC                   | 0.169    | 0.029                        | <0.0001                   | 0.0002                  | 0.0003                 |
| <b>MTsat</b>          |          |                              |                           |                         |                        |
| CI                    | -0.003   | <0.001                       | 0.6212                    | 0.9972                  | 1.0000                 |
| CII                   | -0.065   | 0.004                        | <0.0001                   | 0.0002                  | 0.0003                 |
| CIV                   | -0.081   | 0.007                        | <0.0001                   | 0.0002                  | 0.0003                 |
| MitoD                 | -0.044   | 0.002                        | <0.0001                   | 0.0002                  | 0.0003                 |
| MRC                   | -0.052   | 0.003                        | <0.0001                   | 0.0002                  | 0.0004                 |
| TRC                   | -0.074   | 0.005                        | <0.0001                   | 0.0002                  | 0.0003                 |

We assessed the group differences in R1, R2\*, proton density, and MTsat using t-maps containing PwPD > HCs values and six mitochondrial feature maps: CI, CII, CIV, MitoD, MRC, and TRC. After masking for finite values, n = 21,712 voxels were included in the analysis. For each type of analysis, we report nominal, permutation-derived, and false discovery rate (FDR)-adjusted p-values. CI, CII, CIV: mitochondrial electron transport chain protein complexes I, II, and IV. Cohen's f<sup>2</sup>: standardized effect size measure. HCs: healthy controls. MitoD: mitochondrial density. MTsat: magnetic transfer saturation. MRC: mitochondrial respiration capacity. PwPD: patients with Parkinson's disease. p<sub>FDR</sub>: false-discovery rate-adjusted p-value. p<sub>perm</sub>: non-parametric p-value derived from permutation testing. p<sub>uncorr</sub>: nominal p-value. r: correlation coefficient. R<sup>2</sup>: coefficient of determination. R1: longitudinal relaxation rate. R2\*: effective transverse relaxation rate. TRC: tissue respiration capacity.

**Supplementary Table 6. Voxel-wise spatial correlation between Parkinson's disease-related differences derived from multiparametric mapping and the six mitochondrial brain atlases features across the HMAT atlas-derived ventral premotor cortex mask.**

|                       | <b>r</b> | <b>Cohen's f<sup>2</sup></b> | <b>p<sub>uncorr</sub></b> | <b>p<sub>perm</sub></b> | <b>p<sub>FDR</sub></b> |
|-----------------------|----------|------------------------------|---------------------------|-------------------------|------------------------|
| <b>R1</b>             |          |                              |                           |                         |                        |
| CI                    | -0.045   | 0.002                        | <0.0001                   | 0.0002                  | 0.0003                 |
| CII                   | 0.007    | <0.001                       | 0.1326                    | 0.5691                  | 0.6902                 |
| CIV                   | -0.030   | <0.001                       | <0.0001                   | 0.0002                  | 0.0002                 |
| MitoD                 | -0.016   | <0.001                       | 0.0004                    | 0.0020                  | 0.0027                 |
| MRC                   | -0.009   | <0.001                       | 0.0481                    | 0.2556                  | 0.2812                 |
| TRC                   | -0.029   | <0.001                       | <0.0001                   | 0.0002                  | 0.0003                 |
| <b>R2*</b>            |          |                              |                           |                         |                        |
| CI                    | -0.025   | <0.001                       | <0.0001                   | 0.0002                  | 0.0003                 |
| CII                   | 0.005    | <0.001                       | 0.2869                    | 0.8688                  | 1.0000                 |
| CIV                   | -0.011   | <0.001                       | 0.0203                    | 0.1174                  | 0.1435                 |
| MitoD                 | 0.022    | <0.001                       | <0.0001                   | 0.0002                  | 0.0002                 |
| MRC                   | -0.025   | <0.001                       | <0.0001                   | 0.0002                  | 0.0003                 |
| TRC                   | -0.018   | <0.001                       | <0.0001                   | 0.0002                  | 0.0003                 |
| <b>Proton density</b> |          |                              |                           |                         |                        |
| CI                    | 0.178    | 0.033                        | <0.0001                   | 0.0002                  | 0.0003                 |
| CII                   | 0.178    | 0.033                        | <0.0001                   | 0.0002                  | 0.0003                 |
| CIV                   | 0.177    | 0.032                        | <0.0001                   | 0.0002                  | 0.0002                 |
| MitoD                 | 0.177    | 0.032                        | <0.0001                   | 0.0002                  | 0.0003                 |
| MRC                   | 0.195    | 0.040                        | <0.0001                   | 0.0002                  | 0.0002                 |
| TRC                   | 0.190    | 0.037                        | <0.0001                   | 0.0002                  | 0.0003                 |
| <b>MTsat</b>          |          |                              |                           |                         |                        |
| CI                    | -0.033   | 0.001                        | <0.0001                   | 0.0002                  | 0.0003                 |
| CII                   | 0.025    | <0.001                       | <0.0001                   | 0.0002                  | 0.0003                 |
| CIV                   | -0.035   | 0.001                        | <0.0001                   | 0.0002                  | 0.0003                 |
| MitoD                 | 0.005    | <0.001                       | 0.2658                    | 0.8414                  | 1.0000                 |
| MRC                   | -0.012   | <0.001                       | 0.0108                    | 0.0650                  | 0.1021                 |
| TRC                   | -0.033   | 0.001                        | <0.0001                   | 0.0002                  | 0.0003                 |

We assessed the group differences in R1, R2\*, proton density, and MTsat using t-maps containing PwPD > HCs values and six mitochondrial feature maps: CI, CII, CIV, MitoD, MRC, and TRC. After masking for finite values, n = 46,704 voxels were included in the analysis. For each type of analysis, we report nominal, permutation-derived, and false discovery rate (FDR)-adjusted p-values. CI, CII, CIV: mitochondrial electron transport chain protein complexes I, II, and IV. Cohen's f<sup>2</sup>: standardized effect size measure. HCs: healthy controls. MitoD: mitochondrial density. MTsat: magnetic transfer saturation. MRC: mitochondrial respiration capacity. PwPD: patients with Parkinson's disease. p<sub>FDR</sub>: false-discovery rate-adjusted p-value. p<sub>perm</sub>: non-parametric p-value derived from permutation testing. p<sub>uncorr</sub>: nominal p-value. r: correlation coefficient. R<sup>2</sup>: coefficient of determination. R1: longitudinal relaxation rate. R2\*: effective transverse relaxation rate. TRC: tissue respiration capacity.

**Supplementary Table 7. Voxel-wise spatial correlation between Parkinson's disease-related differences derived from multiparametric mapping and the six mitochondrial brain atlases features across the HybraPD atlas-derived putamen mask.**

|                       | <b>r</b> | <b>Cohen's f<sup>2</sup></b> | <b>p<sub>uncorr</sub></b> | <b>p<sub>perm</sub></b> | <b>p<sub>FDR</sub></b> |
|-----------------------|----------|------------------------------|---------------------------|-------------------------|------------------------|
| <b>R1</b>             |          |                              |                           |                         |                        |
| CI                    | -0.282   | 0.086                        | <0.0001                   | 0.0002                  | 0.0003                 |
| CII                   | -0.301   | 0.101                        | <0.0001                   | 0.0002                  | 0.0003                 |
| CIV                   | -0.254   | 0.069                        | <0.0001                   | 0.0002                  | 0.0002                 |
| MitoD                 | -0.358   | 0.146                        | <0.0001                   | 0.0002                  | 0.0003                 |
| MRC                   | -0.248   | 0.065                        | <0.0001                   | 0.0002                  | 0.0003                 |
| TRC                   | -0.237   | 0.060                        | <0.0001                   | 0.0002                  | 0.0003                 |
| <b>R2*</b>            |          |                              |                           |                         |                        |
| CI                    | 0.137    | 0.019                        | <0.0001                   | 0.0002                  | 0.0003                 |
| CII                   | 0.143    | 0.021                        | <0.0001                   | 0.0002                  | 0.0003                 |
| CIV                   | 0.100    | 0.011                        | <0.0001                   | 0.0002                  | 0.0004                 |
| MitoD                 | 0.156    | 0.025                        | <0.0001                   | 0.0002                  | 0.0002                 |
| MRC                   | 0.109    | 0.012                        | <0.0001                   | 0.0002                  | 0.0003                 |
| TRC                   | 0.125    | 0.015                        | <0.0001                   | 0.0002                  | 0.0003                 |
| <b>Proton density</b> |          |                              |                           |                         |                        |
| CI                    | 0.024    | 0.001                        | 0.0028                    | 0.0163                  | 0.0224                 |
| CII                   | -0.019   | <0.001                       | 0.0257                    | 0.1505                  | 0.1948                 |
| CIV                   | 0.050    | 0.003                        | <0.0001                   | 0.0002                  | 0.0002                 |
| MitoD                 | 0.001    | <0.001                       | 0.8683                    | 1.0000                  | 1.0000                 |
| MRC                   | 0.052    | 0.002                        | <0.0001                   | 0.0002                  | 0.0002                 |
| TRC                   | 0.033    | 0.001                        | <0.0001                   | 0.0002                  | 0.0003                 |
| <b>MTsat</b>          |          |                              |                           |                         |                        |
| CI                    | 0.158    | 0.025                        | <0.0001                   | 0.0002                  | 0.0003                 |
| CII                   | 0.176    | 0.032                        | <0.0001                   | 0.0002                  | 0.0003                 |
| CIV                   | 0.160    | 0.027                        | <0.0001                   | 0.0002                  | 0.0003                 |
| MitoD                 | 0.097    | 0.010                        | <0.0001                   | 0.0002                  | 0.0003                 |
| MRC                   | 0.145    | 0.022                        | <0.0001                   | 0.0002                  | 0.0004                 |
| TRC                   | 0.168    | 0.028                        | <0.0001                   | 0.0002                  | 0.0003                 |

We assessed the group differences in R1, R2\*, proton density, and MTsat using t-maps containing PwPD > HCs values and six mitochondrial feature maps: CI, CII, CIV, MitoD, MRC, and TRC. After masking for finite values, n = 14,838 voxels were included in the analysis. For each type of analysis, we report nominal, permutation-derived, and false discovery rate (FDR)-adjusted p-values. CI, CII, CIV: mitochondrial electron transport chain protein complexes I, II, and IV. Cohen's f<sup>2</sup>: standardized effect size measure. HCs: healthy controls. MitoD: mitochondrial density. MTsat: magnetic transfer saturation. MRC: mitochondrial respiration capacity. PwPD: patients with Parkinson's disease. p<sub>FDR</sub>: false-discovery rate-adjusted p-value. p<sub>perm</sub>: non-parametric p-value derived from permutation testing. p<sub>uncorr</sub>: nominal p-value. r: correlation coefficient. R<sup>2</sup>: coefficient of determination. R1: longitudinal relaxation rate. R2\*: effective transverse relaxation rate. TRC: tissue respiration capacity.

**Supplementary Table 8. Voxel-wise spatial correlation between Parkinson's disease-related differences derived from multiparametric mapping and the six mitochondrial brain atlases features across the HybraPD atlas-derived nucleus accumbens mask.**

|                       | <b>r</b> | <b>Cohen's f<sup>2</sup></b> | <b>p<sub>uncorr</sub></b> | <b>p<sub>perm</sub></b> | <b>p<sub>FDR</sub></b> |
|-----------------------|----------|------------------------------|---------------------------|-------------------------|------------------------|
| <b>R1</b>             |          |                              |                           |                         |                        |
| CI                    | -0.204   | 0.043                        | <0.0001                   | 0.0002                  | 0.0003                 |
| CII                   | -0.283   | 0.087                        | <0.0001                   | 0.0002                  | 0.0003                 |
| CIV                   | -0.282   | 0.086                        | <0.0001                   | 0.0002                  | 0.0002                 |
| MitoD                 | -0.337   | 0.127                        | <0.0001                   | 0.0002                  | 0.0003                 |
| MRC                   | -0.292   | 0.093                        | <0.0001                   | 0.0002                  | 0.0003                 |
| TRC                   | -0.254   | 0.067                        | <0.0001                   | 0.0002                  | 0.0003                 |
| <b>R2*</b>            |          |                              |                           |                         |                        |
| CI                    | -0.270   | 0.078                        | <0.0001                   | 0.0002                  | 0.0003                 |
| CII                   | -0.367   | 0.155                        | <0.0001                   | 0.0002                  | 0.0003                 |
| CIV                   | -0.284   | 0.088                        | <0.0001                   | 0.0002                  | 0.0004                 |
| MitoD                 | -0.461   | 0.271                        | <0.0001                   | 0.0002                  | 0.0002                 |
| MRC                   | -0.250   | 0.067                        | <0.0001                   | 0.0002                  | 0.0003                 |
| TRC                   | -0.256   | 0.070                        | <0.0001                   | 0.0002                  | 0.0003                 |
| <b>Proton density</b> |          |                              |                           |                         |                        |
| CI                    | 0.082    | 0.007                        | 0.0034                    | 0.0187                  | 0.0242                 |
| CII                   | 0.135    | 0.018                        | <0.0001                   | 0.0002                  | 0.0003                 |
| CIV                   | 0.268    | 0.077                        | <0.0001                   | 0.0002                  | 0.0002                 |
| MitoD                 | 0.135    | 0.018                        | <0.0001                   | 0.0002                  | 0.0003                 |
| MRC                   | 0.288    | 0.091                        | <0.0001                   | 0.0002                  | 0.0002                 |
| TRC                   | 0.249    | 0.067                        | <0.0001                   | 0.0002                  | 0.0003                 |
| <b>MTsat</b>          |          |                              |                           |                         |                        |
| CI                    | 0.310    | 0.107                        | <0.0001                   | 0.0002                  | 0.0003                 |
| CII                   | 0.187    | 0.037                        | <0.0001                   | 0.0002                  | 0.0003                 |
| CIV                   | -0.082   | 0.006                        | 0.0035                    | 0.0239                  | 0.0309                 |
| MitoD                 | 0.119    | 0.014                        | <0.0001                   | 0.0002                  | 0.0003                 |
| MRC                   | -0.014   | 0.001                        | 0.6054                    | 0.9966                  | 0.9992                 |
| TRC                   | -0.018   | 0.001                        | 0.5058                    | 0.9852                  | 0.9966                 |

We assessed the group differences in R1, R2\*, proton density, and MTsat using t-maps containing PwPD > HCs values and six mitochondrial feature maps: CI, CII, CIV, MitoD, MRC, and TRC. After masking for finite values, n = 1,281 voxels were included in the analysis. For each type of analysis, we report nominal, permutation-derived, and false discovery rate (FDR)-adjusted p-values. CI, CII, CIV: mitochondrial electron transport chain protein complexes I, II, and IV. Cohen's f<sup>2</sup>: standardized effect size measure. HCs: healthy controls. MitoD: mitochondrial density. MTsat: magnetic transfer saturation. MRC: mitochondrial respiration capacity. PwPD: patients with Parkinson's disease. p<sub>FDR</sub>: false-discovery rate-adjusted p-value. p<sub>perm</sub>: non-parametric p-value derived from permutation testing. p<sub>uncorr</sub>: nominal p-value. r: correlation coefficient. R<sup>2</sup>: coefficient of determination. R1: longitudinal relaxation rate. R2\*: effective transverse relaxation rate. TRC: tissue respiration capacity.

**Supplementary Table 9. Voxel-wise spatial correlation between Parkinson's disease-related differences derived from multiparametric mapping and the six mitochondrial brain atlases features across the HybraPD atlas-derived red nucleus mask.**

|                       | <b>r</b> | <b>Cohen's f<sup>2</sup></b> | <b>p<sub>uncorr</sub></b> | <b>p<sub>perm</sub></b> | <b>p<sub>FDR</sub></b> |
|-----------------------|----------|------------------------------|---------------------------|-------------------------|------------------------|
| <b>R1</b>             |          |                              |                           |                         |                        |
| CI                    | 0.114    | 0.014                        | 0.0001                    | 0.0010                  | 0.0015                 |
| CII                   | 0.168    | 0.028                        | <0.0001                   | 0.0002                  | 0.0003                 |
| CIV                   | 0.145    | 0.022                        | <0.0001                   | 0.0002                  | 0.0002                 |
| MitoD                 | 0.238    | 0.060                        | <0.0001                   | 0.0002                  | 0.0003                 |
| MRC                   | 0.132    | 0.017                        | <0.0001                   | 0.0002                  | 0.0003                 |
| TRC                   | 0.105    | 0.011                        | 0.0004                    | 0.0033                  | 0.0045                 |
| <b>R2*</b>            |          |                              |                           |                         |                        |
| CI                    | 0.173    | 0.031                        | <0.0001                   | 0.0002                  | 0.0003                 |
| CII                   | 0.202    | 0.042                        | <0.0001                   | 0.0002                  | 0.0003                 |
| CIV                   | 0.104    | 0.011                        | 0.0005                    | 0.0029                  | 0.0049                 |
| MitoD                 | 0.196    | 0.040                        | <0.0001                   | 0.0002                  | 0.0002                 |
| MRC                   | 0.136    | 0.019                        | <0.0001                   | 0.0002                  | 0.0003                 |
| TRC                   | 0.133    | 0.017                        | <0.0001                   | 0.0002                  | 0.0003                 |
| <b>Proton density</b> |          |                              |                           |                         |                        |
| CI                    | -0.039   | 0.015                        | 0.1959                    | 0.7378                  | 0.7729                 |
| CII                   | -0.034   | 0.012                        | 0.2481                    | 0.8248                  | 0.8641                 |
| CIV                   | 0.015    | 0.002                        | 0.6381                    | 0.9986                  | 1.0000                 |
| MitoD                 | 0.041    | 0.017                        | 0.1815                    | 0.7086                  | 0.9170                 |
| MRC                   | -0.022   | 0.005                        | 0.4830                    | 0.9815                  | 0.9980                 |
| TRC                   | -0.043   | 0.001                        | 0.1593                    | 0.6534                  | 0.7187                 |
| <b>MTsat</b>          |          |                              |                           |                         |                        |
| CI                    | 0.013    | <0.001                       | 0.6646                    | 0.9994                  | 1.0000                 |
| CII                   | 0.082    | 0.007                        | 0.0061                    | 0.0372                  | 0.0545                 |
| CIV                   | 0.112    | 0.013                        | 0.0127                    | 0.0012                  | 0.0016                 |
| MitoD                 | 0.159    | 0.026                        | <0.0001                   | 0.0002                  | 0.0003                 |
| MRC                   | 0.074    | 0.005                        | 0.0055                    | 0.0818                  | 0.1200                 |
| TRC                   | 0.037    | 0.001                        | 0.0014                    | 0.7814                  | 0.9048                 |

We assessed the group differences in R1, R2\*, proton density, and MTsat using t-maps containing PwPD > HCs values and six mitochondrial feature maps: CI, CII, CIV, MitoD, MRC, and TRC. After masking for finite values, n = 1,101 voxels were included in the analysis. For each type of analysis, we report nominal, permutation-derived, and false discovery rate (FDR)-adjusted p-values. CI, CII, CIV: mitochondrial electron transport chain protein complexes I, II, and IV. Cohen's f<sup>2</sup>: standardized effect size measure. HCs: healthy controls. MitoD: mitochondrial density. MTsat: magnetic transfer saturation. MRC: mitochondrial respiration capacity. PwPD: patients with Parkinson's disease. p<sub>FDR</sub>: false-discovery rate-adjusted p-value. p<sub>perm</sub>: non-parametric p-value derived from permutation testing. p<sub>uncorr</sub>: nominal p-value. r: correlation coefficient. R<sup>2</sup>: coefficient of determination. R1: longitudinal relaxation rate. R2\*: effective transverse relaxation rate. TRC: tissue respiration capacity.

**Supplementary Table 10. Voxel-wise spatial correlation between Parkinson's disease-related differences derived from multiparametric mapping and the six mitochondrial brain atlases features across the HybraPD atlas-derived substantia nigra mask.**

|                       | <b>r</b> | <b>Cohen's f<sup>2</sup></b> | <b>p<sub>uncorr</sub></b> | <b>p<sub>perm</sub></b> | <b>p<sub>FDR</sub></b> |
|-----------------------|----------|------------------------------|---------------------------|-------------------------|------------------------|
| <b>R1</b>             |          |                              |                           |                         |                        |
| CI                    | 0.176    | 0.016                        | 0.0002                    | 0.0019                  | 0.0026                 |
| CII                   | 0.273    | 0.119                        | <0.0001                   | 0.0002                  | 0.0003                 |
| CIV                   | 0.131    | 0.016                        | 0.0004                    | 0.0023                  | 0.0028                 |
| MitoD                 | 0.161    | 0.093                        | <0.0001                   | 0.0002                  | 0.0003                 |
| MRC                   | 0.074    | 0.007                        | 0.0151                    | 0.0927                  | 0.1133                 |
| TRC                   | 0.168    | 0.008                        | 0.0073                    | 0.0481                  | 0.0588                 |
| <b>R2*</b>            |          |                              |                           |                         |                        |
| CI                    | 0.168    | 0.028                        | <0.0001                   | 0.0002                  | 0.0003                 |
| CII                   | 0.234    | 0.058                        | <0.0001                   | 0.0002                  | 0.0003                 |
| CIV                   | 0.036    | 0.001                        | 0.1651                    | 0.6460                  | 0.6768                 |
| MitoD                 | 0.052    | 0.003                        | 0.0456                    | 0.2325                  | 0.2842                 |
| MRC                   | 0.052    | 0.003                        | 0.0442                    | 0.2267                  | 0.2771                 |
| TRC                   | 0.106    | 0.011                        | <0.0001                   | 0.0002                  | 0.0003                 |
| <b>Proton density</b> |          |                              |                           |                         |                        |
| CI                    | 0.236    | 0.059                        | <0.0001                   | 0.0002                  | 0.0003                 |
| CII                   | 0.292    | 0.093                        | <0.0001                   | 0.0002                  | 0.0003                 |
| CIV                   | 0.153    | 0.024                        | <0.0001                   | 0.0002                  | 0.0002                 |
| MitoD                 | 0.154    | 0.024                        | <0.0001                   | 0.0002                  | 0.0004                 |
| MRC                   | 0.125    | 0.016                        | <0.0001                   | 0.0002                  | 0.0002                 |
| TRC                   | 0.204    | 0.043                        | <0.0001                   | 0.0002                  | 0.0003                 |
| <b>MTsat</b>          |          |                              |                           |                         |                        |
| CI                    | 0.147    | 0.022                        | <0.0001                   | 0.0002                  | 0.0003                 |
| CII                   | 0.272    | 0.080                        | <0.0001                   | 0.0002                  | 0.0003                 |
| CIV                   | 0.104    | 0.011                        | <0.0001                   | 0.0002                  | 0.0003                 |
| MitoD                 | 0.141    | 0.020                        | <0.0001                   | 0.0002                  | 0.0003                 |
| MRC                   | 0.044    | 0.002                        | 0.0846                    | 0.3961                  | 0.5126                 |
| TRC                   | 0.147    | 0.022                        | <0.0001                   | 0.0002                  | 0.0003                 |

We assessed the group differences in R1, R2\*, proton density, and MTsat using t-maps containing PwPD > HCs values and six mitochondrial feature maps: CI, CII, CIV, MitoD, MRC, and TRC. After masking for finite values, n = 1,499 voxels were included in the analysis. For each type of analysis, we report nominal, permutation-derived, and false discovery rate (FDR)-adjusted p-values. CI, CII, CIV: mitochondrial electron transport chain protein complexes I, II, and IV. Cohen's f<sup>2</sup>: standardized effect size measure. HCs: healthy controls. MitoD: mitochondrial density. MTsat: magnetic transfer saturation. MRC: mitochondrial respiration capacity. PwPD: patients with Parkinson's disease. p<sub>FDR</sub>: false-discovery rate-adjusted p-value. p<sub>perm</sub>: non-parametric p-value derived from permutation testing. p<sub>uncorr</sub>: nominal p-value. r: correlation coefficient. R<sup>2</sup>: coefficient of determination. R1: longitudinal relaxation rate. R2\*: effective transverse relaxation rate. TRC: tissue respiration capacity.

**Supplementary Table 11. Voxel-wise spatial correlation between Parkinson's disease-related differences derived from multiparametric mapping and the six mitochondrial brain atlases features across the HybraPD atlas-derived caudate nucleus mask.**

|                       | <b>r</b> | <b>Cohen's f<sup>2</sup></b> | <b>p<sub>uncorr</sub></b> | <b>p<sub>perm</sub></b> | <b>p<sub>FDR</sub></b> |
|-----------------------|----------|------------------------------|---------------------------|-------------------------|------------------------|
| <b>R1</b>             |          |                              |                           |                         |                        |
| CI                    | -0.131   | 0.018                        | <0.0001                   | 0.0002                  | 0.0003                 |
| CII                   | -0.201   | 0.042                        | <0.0001                   | 0.0002                  | 0.0003                 |
| CIV                   | -0.101   | 0.010                        | <0.0001                   | 0.0002                  | 0.0002                 |
| MitoD                 | -0.163   | 0.027                        | <0.0001                   | 0.0002                  | 0.0003                 |
| MRC                   | -0.187   | 0.036                        | <0.0001                   | 0.0002                  | 0.0003                 |
| TRC                   | -0.125   | 0.016                        | <0.0001                   | 0.0002                  | 0.0003                 |
| <b>R2*</b>            |          |                              |                           |                         |                        |
| CI                    | 0.097    | 0.009                        | <0.0001                   | 0.0002                  | 0.0003                 |
| CII                   | -0.010   | <0.001                       | 0.0243                    | 0.8172                  | 1.0000                 |
| CIV                   | 0.143    | 0.021                        | <0.0001                   | 0.0002                  | 0.0004                 |
| MitoD                 | 0.107    | 0.011                        | <0.0001                   | 0.0002                  | 0.0002                 |
| MRC                   | 0.019    | <0.001                       | 0.0264                    | 0.1465                  | 0.1896                 |
| TRC                   | 0.109    | 0.012                        | <0.0001                   | 0.0002                  | 0.0003                 |
| <b>Proton density</b> |          |                              |                           |                         |                        |
| CI                    | 0.248    | 0.066                        | <0.0001                   | 0.0002                  | 0.0003                 |
| CII                   | 0.370    | 0.158                        | <0.0001                   | 0.0002                  | 0.0003                 |
| CIV                   | 0.240    | 0.061                        | <0.0001                   | 0.0002                  | 0.0003                 |
| MitoD                 | 0.131    | 0.017                        | <0.0001                   | 0.0002                  | 0.0003                 |
| MRC                   | 0.279    | 0.084                        | <0.0001                   | 0.0002                  | 0.0002                 |
| TRC                   | 0.299    | 0.098                        | <0.0001                   | 0.0002                  | 0.0003                 |
| <b>MTsat</b>          |          |                              |                           |                         |                        |
| CI                    | -0.303   | 0.101                        | <0.0001                   | 0.0002                  | 0.0003                 |
| CII                   | -0.350   | 0.140                        | <0.0001                   | 0.0002                  | 0.0003                 |
| CIV                   | -0.271   | 0.079                        | <0.0001                   | 0.0002                  | 0.0003                 |
| MitoD                 | -0.249   | 0.066                        | <0.0001                   | 0.0002                  | 0.0003                 |
| MRC                   | -0.374   | 0.162                        | <0.0001                   | 0.0002                  | 0.0004                 |
| TRC                   | -0.274   | 0.081                        | <0.0001                   | 0.0002                  | 0.0003                 |

We assessed the group differences in R1, R2\*, proton density, and MTsat using t-maps containing PwPD > HCs values and six mitochondrial feature maps: CI, CII, CIV, MitoD, MRC, and TRC. After masking for finite values, n = 13,224 voxels were included in the analysis. For each type of analysis, we report nominal, permutation-derived, and false discovery rate (FDR)-adjusted p-values. CI, CII, CIV: mitochondrial electron transport chain protein complexes I, II, and IV. Cohen's f<sup>2</sup>: standardized effect size measure. HCs: healthy controls. MitoD: mitochondrial density. MTsat: magnetic transfer saturation. MRC: mitochondrial respiration capacity. PwPD: patients with Parkinson's disease. p<sub>FDR</sub>: false-discovery rate-adjusted p-value. p<sub>perm</sub>: non-parametric p-value derived from permutation testing. p<sub>uncorr</sub>: nominal p-value. r: correlation coefficient. R<sup>2</sup>: coefficient of determination. R1: longitudinal relaxation rate. R2\*: effective transverse relaxation rate. TRC: tissue respiration capacity.

**Supplementary Table 12. Voxel-wise spatial correlation between Parkinson's disease-related differences derived from multiparametric mapping and the six mitochondrial brain atlases features across the HybraPD atlas-derived globus pallidus mask.**

|                       | <b>r</b> | <b>Cohen's f<sup>2</sup></b> | <b>p<sub>uncorr</sub></b> | <b>p<sub>perm</sub></b> | <b>p<sub>FDR</sub></b> |
|-----------------------|----------|------------------------------|---------------------------|-------------------------|------------------------|
| <b>R1</b>             |          |                              |                           |                         |                        |
| CI                    | -0.176   | 0.032                        | <0.0001                   | 0.0002                  | 0.0003                 |
| CII                   | -0.261   | 0.073                        | <0.0001                   | 0.0002                  | 0.0003                 |
| CIV                   | -0.165   | 0.028                        | <0.0001                   | 0.0002                  | 0.0002                 |
| MitoD                 | -0.195   | 0.039                        | <0.0001                   | 0.0002                  | 0.0003                 |
| MRC                   | -0.108   | 0.012                        | <0.0001                   | 0.0002                  | 0.0003                 |
| TRC                   | -0.187   | 0.036                        | <0.0001                   | 0.0002                  | 0.0003                 |
| <b>R2*</b>            |          |                              |                           |                         |                        |
| CI                    | 0.015    | <0.001                       | 0.2586                    | 0.8282                  | 0.9589                 |
| CII                   | -0.004   | <0.001                       | 0.7779                    | 1.0000                  | 1.0000                 |
| CIV                   | -0.038   | 0.001                        | 0.0049                    | 0.0268                  | 0.0393                 |
| MitoD                 | 0.012    | <0.001                       | 0.3608                    | 0.9344                  | 0.9999                 |
| MRC                   | -0.020   | <0.001                       | 0.1295                    | 0.5584                  | 0.5950                 |
| TRC                   | -0.026   | <0.001                       | 0.0564                    | 0.2847                  | 0.3296                 |
| <b>Proton density</b> |          |                              |                           |                         |                        |
| CI                    | -0.025   | <0.001                       | 0.0670                    | 0.3363                  | 0.3894                 |
| CII                   | -0.156   | 0.025                        | <0.0001                   | 0.0002                  | 0.0003                 |
| CIV                   | 0.081    | 0.007                        | <0.0001                   | 0.0002                  | 0.0002                 |
| MitoD                 | 0.004    | <0.001                       | 0.7585                    | 0.9996                  | 1.0000                 |
| MRC                   | 0.098    | 0.010                        | <0.0001                   | 0.0002                  | 0.0002                 |
| TRC                   | 0.036    | 0.001                        | 0.0079                    | 0.0432                  | 0.0559                 |
| <b>MTsat</b>          |          |                              |                           |                         |                        |
| CI                    | 0.017    | <0.001                       | 0.2214                    | 0.7782                  | 1.0000                 |
| CII                   | -0.005   | <0.001                       | 0.6909                    | 0.9992                  | 0.9992                 |
| CIV                   | 0.119    | 0.014                        | <0.0001                   | 0.0002                  | 0.0003                 |
| MitoD                 | -0.004   | <0.001                       | 0.7600                    | 0.9994                  | 1.0000                 |
| MRC                   | 0.118    | 0.014                        | <0.0001                   | 0.0002                  | 0.0004                 |
| TRC                   | 0.101    | 0.010                        | <0.0001                   | 0.0002                  | 0.0003                 |

We assessed the group differences in R1, R2\*, proton density, and MTsat using t-maps containing PwPD > HCs values and six mitochondrial feature maps: CI, CII, CIV, MitoD, MRC, and TRC. After masking for finite values, n = 5,361 voxels were included in the analysis. For each type of analysis, we report nominal, permutation-derived, and false discovery rate (FDR)-adjusted p-values. CI, CII, CIV: mitochondrial electron transport chain protein complexes I, II, and IV. Cohen's f<sup>2</sup>: standardized effect size measure. HCs: healthy controls. MitoD: mitochondrial density. MTsat: magnetic transfer saturation. MRC: mitochondrial respiration capacity. PwPD: patients with Parkinson's disease. p<sub>FDR</sub>: false-discovery rate-adjusted p-value. p<sub>perm</sub>: non-parametric p-value derived from permutation testing. p<sub>uncorr</sub>: nominal p-value. r: correlation coefficient. R<sup>2</sup>: coefficient of determination. R1: longitudinal relaxation rate. R2\*: effective transverse relaxation rate. TRC: tissue respiration capacity.

**Supplementary Table 13. Voxel-wise spatial correlation between Parkinson's disease-related differences derived from multiparametric mapping and the six mitochondrial brain atlases features across the HybraPD atlas-derived ventral pallidum mask.**

|                       | <b>r</b> | <b>Cohen's f<sup>2</sup></b> | <b>p<sub>uncorr</sub></b> | <b>p<sub>perm</sub></b> | <b>p<sub>FDR</sub></b> |
|-----------------------|----------|------------------------------|---------------------------|-------------------------|------------------------|
| <b>R1</b>             |          |                              |                           |                         |                        |
| CI                    | -0.174   | 0.031                        | <0.0001                   | 0.0002                  | 0.0003                 |
| CII                   | -0.235   | 0.058                        | <0.0001                   | 0.0002                  | 0.0003                 |
| CIV                   | -0.230   | 0.056                        | <0.0001                   | 0.0002                  | 0.0002                 |
| MitoD                 | -0.217   | 0.050                        | <0.0001                   | 0.0002                  | 0.0003                 |
| MRC                   | -0.205   | 0.044                        | <0.0001                   | 0.0002                  | 0.0003                 |
| TRC                   | -0.186   | 0.036                        | <0.0001                   | 0.0002                  | 0.0003                 |
| <b>R2*</b>            |          |                              |                           |                         |                        |
| CI                    | -0.080   | 0.006                        | 0.0619                    | 0.3211                  | 0.4155                 |
| CII                   | -0.132   | 0.018                        | 0.0020                    | 0.0126                  | 0.0185                 |
| CIV                   | -0.194   | 0.039                        | <0.0001                   | 0.0002                  | 0.0004                 |
| MitoD                 | -0.207   | 0.045                        | <0.0001                   | 0.0002                  | 0.0002                 |
| MRC                   | -0.106   | 0.011                        | 0.0135                    | 0.0748                  | 0.1028                 |
| TRC                   | -0.154   | 0.024                        | 0.0003                    | 0.0038                  | 0.0052                 |
| <b>Proton density</b> |          |                              |                           |                         |                        |
| CI                    | 0.113    | 0.013                        | 0.0080                    | 0.0436                  | 0.0533                 |
| CII                   | 0.060    | 0.004                        | 0.1606                    | 0.6507                  | 0.7534                 |
| CIV                   | 0.122    | 0.015                        | 0.0042                    | 0.0248                  | 0.0303                 |
| MitoD                 | 0.119    | 0.014                        | 0.0055                    | 0.0310                  | 0.0426                 |
| MRC                   | 0.107    | 0.011                        | 0.0128                    | 0.0668                  | 0.0816                 |
| TRC                   | 0.082    | 0.007                        | 0.0561                    | 0.2741                  | 0.3350                 |
| <b>MTsat</b>          |          |                              |                           |                         |                        |
| CI                    | -0.024   | <0.001                       | 0.5753                    | 0.9936                  | 1.0000                 |
| CII                   | -0.074   | 0.005                        | 0.0858                    | 0.4151                  | 0.4885                 |
| CIV                   | -0.006   | <0.001                       | 0.8899                    | 1.0000                  | 1.0000                 |
| MitoD                 | -0.003   | <0.001                       | 0.9356                    | 1.0000                  | 1.0000                 |
| MRC                   | -0.055   | 0.003                        | 0.2018                    | 0.7428                  | 0.9079                 |
| TRC                   | -0.048   | 0.002                        | 0.2608                    | 0.8356                  | 0.9386                 |

We assessed the group differences in R1, R2\*, proton density, and MTsat using t-maps containing PwPD > HCs values and six mitochondrial feature maps: CI, CII, CIV, MitoD, MRC, and TRC. After masking for finite values, n = 8,266 voxels were included in the analysis. For each type of analysis, we report nominal, permutation-derived, and false discovery rate (FDR)-adjusted p-values. CI, CII, CIV: mitochondrial electron transport chain protein complexes I, II, and IV. Cohen's f<sup>2</sup>: standardized effect size measure. HCs: healthy controls. MitoD: mitochondrial density. MTsat: magnetic transfer saturation. MRC: mitochondrial respiration capacity. PwPD: patients with Parkinson's disease. p<sub>FDR</sub>: false-discovery rate-adjusted p-value. p<sub>perm</sub>: non-parametric p-value derived from permutation testing. p<sub>uncorr</sub>: nominal p-value. r: correlation coefficient. R<sup>2</sup>: coefficient of determination. R1: longitudinal relaxation rate. R2\*: effective transverse relaxation rate. TRC: tissue respiration capacity.

**Supplementary Table 14. Voxel-wise spatial correlation between Parkinson's disease-related differences derived from multiparametric mapping and the six mitochondrial brain atlases features across the HybraPD atlas-derived habenular nucleus mask.**

|                       | <b>r</b> | <b>Cohen's f<sup>2</sup></b> | <b>p<sub>uncorr</sub></b> | <b>p<sub>perm</sub></b> | <b>p<sub>FDR</sub></b> |
|-----------------------|----------|------------------------------|---------------------------|-------------------------|------------------------|
| <b>R1</b>             |          |                              |                           |                         |                        |
| CI                    | 0.127    | 0.016                        | 0.0303                    | 0.1663                  | 0.1925                 |
| CII                   | 0.007    | <0.001                       | 0.9036                    | 1.0000                  | 1.0000                 |
| CIV                   | 0.096    | 0.009                        | 0.1020                    | 0.4697                  | 0.5464                 |
| MitoD                 | 0.230    | 0.056                        | 0.0000                    | 0.0005                  | 0.0007                 |
| MRC                   | 0.090    | 0.008                        | 0.1251                    | 0.5466                  | 0.5613                 |
| TRC                   | 0.077    | 0.006                        | 0.1932                    | 0.7232                  | 0.8374                 |
| <b>R2*</b>            |          |                              |                           |                         |                        |
| CI                    | -0.045   | 0.002                        | 0.4407                    | 0.9691                  | 1.0000                 |
| CII                   | -0.049   | 0.003                        | 0.4024                    | 0.9548                  | 1.0000                 |
| CIV                   | -0.184   | 0.036                        | 0.0016                    | 0.0093                  | 0.0146                 |
| MitoD                 | -0.088   | 0.007                        | 0.1394                    | 0.6026                  | 0.6977                 |
| MRC                   | -0.202   | 0.043                        | 0.0006                    | 0.0039                  | 0.0061                 |
| TRC                   | -0.172   | 0.031                        | 0.0037                    | 0.0205                  | 0.0265                 |
| <b>Proton density</b> |          |                              |                           |                         |                        |
| CI                    | -0.205   | 0.044                        | 0.0005                    | 0.0038                  | 0.0056                 |
| CII                   | 0.002    | <0.001                       | 0.9729                    | 1.0000                  | 1.0000                 |
| CIV                   | 0.094    | 0.091                        | 0.1097                    | 0.5028                  | 0.5531                 |
| MitoD                 | 0.017    | 0.003                        | 0.7702                    | 1.0000                  | 1.0000                 |
| MRC                   | 0.039    | 0.015                        | 0.5058                    | 0.9855                  | 0.9980                 |
| TRC                   | 0.057    | 0.004                        | 0.3299                    | 0.9121                  | 0.9555                 |
| <b>MTsat</b>          |          |                              |                           |                         |                        |
| CI                    | -0.017   | <0.001                       | 0.7686                    | 0.9998                  | 1.0000                 |
| CII                   | -0.054   | 0.002                        | 0.3660                    | 0.9333                  | 0.9919                 |
| CIV                   | 0.109    | 0.012                        | 0.0632                    | 0.3165                  | 0.3481                 |
| MitoD                 | 0.049    | 0.002                        | 0.4107                    | 0.9565                  | 1.0000                 |
| MRC                   | 0.121    | 0.014                        | 0.0396                    | 0.2087                  | 0.2870                 |
| TRC                   | 0.096    | 0.009                        | 0.1018                    | 0.4623                  | 0.5650                 |

We assessed the group differences in R1, R2\*, proton density, and MTsat using t-maps containing PwPD > HCs values and six mitochondrial feature maps: CI, CII, CIV, MitoD, MRC, and TRC. After masking for finite values, n = 228 voxels were included in the analysis. For each type of analysis, we report nominal, permutation-derived, and false discovery rate (FDR)-adjusted p-values. CI, CII, CIV: mitochondrial electron transport chain protein complexes I, II, and IV. Cohen's f<sup>2</sup>: standardized effect size measure. HCs: healthy controls. MitoD: mitochondrial density. MTsat: magnetic transfer saturation. MRC: mitochondrial respiration capacity. PwPD: patients with Parkinson's disease. p<sub>FDR</sub>: false-discovery rate-adjusted p-value. p<sub>perm</sub>: non-parametric p-value derived from permutation testing. p<sub>uncorr</sub>: nominal p-value. r: correlation coefficient. R<sup>2</sup>: coefficient of determination. R1: longitudinal relaxation rate. R2\*: effective transverse relaxation rate. TRC: tissue respiration capacity.

**Supplementary Table 15. Voxel-wise spatial correlation between Parkinson's disease-related differences derived from multiparametric mapping and the six mitochondrial brain atlases features across the HybraPD atlas-derived dentate nucleus mask.**

|                       | <b>r</b> | <b>Cohen's f<sup>2</sup></b> | <b>p<sub>uncorr</sub></b> | <b>p<sub>perm</sub></b> | <b>p<sub>FDR</sub></b> |
|-----------------------|----------|------------------------------|---------------------------|-------------------------|------------------------|
| <b>R1</b>             |          |                              |                           |                         |                        |
| CI                    | 0.107    | 0.012                        | <0.0001                   | 0.0002                  | 0.0003                 |
| CII                   | 0.048    | 0.002                        | 0.0158                    | 0.0949                  | 0.1228                 |
| CIV                   | 0.030    | <0.001                       | 0.1339                    | 0.5832                  | 0.6111                 |
| MitoD                 | 0.052    | 0.002                        | 0.0089                    | 0.0595                  | 0.0770                 |
| MRC                   | 0.046    | 0.002                        | 0.0208                    | 0.1205                  | 0.1395                 |
| TRC                   | 0.023    | <0.001                       | 0.2438                    | 0.8142                  | 0.8530                 |
| <b>R2*</b>            |          |                              |                           |                         |                        |
| CI                    | 0.002    | <0.001                       | 0.8939                    | 1.0000                  | 1.0000                 |
| CII                   | -0.011   | 0.001                        | 0.5562                    | 0.9932                  | 1.0000                 |
| CIV                   | -0.050   | 0.002                        | 0.0123                    | 0.0747                  | 0.0967                 |
| MitoD                 | 0.008    | <0.001                       | 0.6891                    | 0.9990                  | 0.9990                 |
| MRC                   | -0.030   | <0.001                       | 0.1280                    | 0.5680                  | 0.5950                 |
| TRC                   | -0.032   | 0.001                        | 0.1069                    | 0.4993                  | 0.5426                 |
| <b>Proton density</b> |          |                              |                           |                         |                        |
| CI                    | 0.134    | 0.018                        | <0.0001                   | 0.0002                  | 0.0003                 |
| CII                   | 0.150    | 0.023                        | <0.0001                   | 0.0002                  | 0.0003                 |
| CIV                   | 0.002    | <0.001                       | 0.9076                    | 1.0000                  | 1.0000                 |
| MitoD                 | -0.087   | 0.007                        | <0.0001                   | 0.0003                  | 0.0005                 |
| MRC                   | 0.102    | 0.010                        | <0.0001                   | 0.0002                  | 0.0004                 |
| TRC                   | 0.063    | 0.004                        | 0.0014                    | 0.0083                  | 0.0137                 |
| <b>MTsat</b>          |          |                              |                           |                         |                        |
| CI                    | -0.020   | <0.001                       | 0.3060                    | 0.8932                  | 1.0000                 |
| CII                   | 0.046    | 0.003                        | 0.0199                    | 0.1103                  | 0.1517                 |
| CIV                   | -0.052   | 0.002                        | 0.0086                    | 0.0539                  | 0.0624                 |
| MitoD                 | -0.009   | <0.001                       | 0.6305                    | 0.9988                  | 1.0000                 |
| MRC                   | 0.015    | <0.001                       | 0.4411                    | 0.9722                  | 0.9966                 |
| TRC                   | -0.008   | <0.001                       | 0.6723                    | 0.9992                  | 0.9992                 |

We assessed the group differences in R1, R2\*, proton density, and MTsat using t-maps containing PwPD > HCs values and six mitochondrial feature maps: CI, CII, CIV, MitoD, MRC, and TRC. After masking for finite values, n = 2,485 voxels were included in the analysis. For each type of analysis, we report nominal, permutation-derived, and false discovery rate (FDR)-adjusted p-values. CI, CII, CIV: mitochondrial electron transport chain protein complexes I, II, and IV. Cohen's f<sup>2</sup>: standardized effect size measure. HCs: healthy controls. MitoD: mitochondrial density. MTsat: magnetic transfer saturation. MRC: mitochondrial respiration capacity. PwPD: patients with Parkinson's disease. p<sub>FDR</sub>: false-discovery rate-adjusted p-value. p<sub>perm</sub>: non-parametric p-value derived from permutation testing. p<sub>uncorr</sub>: nominal p-value. r: correlation coefficient. R<sup>2</sup>: coefficient of determination. R1: longitudinal relaxation rate. R2\*: effective transverse relaxation rate. TRC: tissue respiration capacity.

**Supplementary Table 16. Voxel-wise spatial correlation between Parkinson's disease-related differences derived from multiparametric mapping and the six mitochondrial brain atlases features across the HybraPD atlas-derived subthalamic nucleus mask.**

|                       | <b>r</b> | <b>Cohen's f<sup>2</sup></b> | <b>p<sub>uncorr</sub></b> | <b>p<sub>perm</sub></b> | <b>p<sub>FDR</sub></b> |
|-----------------------|----------|------------------------------|---------------------------|-------------------------|------------------------|
| <b>R1</b>             |          |                              |                           |                         |                        |
| CI                    | -0.038   | 0.001                        | 0.3649                    | 0.9316                  | 0.9760                 |
| CII                   | -0.035   | 0.001                        | 0.4155                    | 0.9604                  | 1.0000                 |
| CIV                   | 0.134    | 0.018                        | 0.0015                    | 0.0074                  | 0.0086                 |
| MitoD                 | 0.046    | 0.002                        | 0.2827                    | 0.8604                  | 0.9014                 |
| MRC                   | 0.104    | 0.011                        | 0.0143                    | 0.0810                  | 0.1048                 |
| TRC                   | 0.037    | 0.001                        | 0.3879                    | 0.9470                  | 0.9470                 |
| <b>R2*</b>            |          |                              |                           |                         |                        |
| CI                    | -0.021   | <0.001                       | 0.6240                    | 0.9970                  | 0.9970                 |
| CII                   | -0.072   | 0.005                        | 0.0903                    | 0.4377                  | 0.5068                 |
| CIV                   | -0.034   | 0.001                        | 0.4214                    | 0.9604                  | 0.9990                 |
| MitoD                 | -0.113   | 0.013                        | 0.0078                    | 0.0422                  | 0.0580                 |
| MRC                   | -0.022   | <0.001                       | 0.6018                    | 0.9958                  | 1.0000                 |
| TRC                   | -0.041   | 0.002                        | 0.3321                    | 0.9096                  | 0.9970                 |
| <b>Proton density</b> |          |                              |                           |                         |                        |
| CI                    | -0.041   | 0.002                        | 0.3305                    | 0.9082                  | 0.9082                 |
| CII                   | -0.055   | 0.003                        | 0.1967                    | 0.7294                  | 0.8023                 |
| CIV                   | 0.116    | 0.014                        | 0.0060                    | 0.0310                  | 0.0359                 |
| MitoD                 | 0.011    | <0.001                       | 0.7899                    | 1.0000                  | 1.0000                 |
| MRC                   | 0.092    | 0.008                        | 0.0305                    | 0.1665                  | 0.1928                 |
| TRC                   | 0.031    | 0.001                        | 0.4597                    | 0.9742                  | 0.9742                 |
| <b>MTsat</b>          |          |                              |                           |                         |                        |
| CI                    | 0.008    | <0.001                       | 0.8487                    | 1.0000                  | 1.0000                 |
| CII                   | 0.036    | 0.001                        | 0.3887                    | 0.9468                  | 0.9919                 |
| CIV                   | 0.174    | 0.031                        | <0.0001                   | 0.0004                  | 0.0006                 |
| MitoD                 | 0.102    | 0.010                        | 0.0166                    | 0.0904                  | 0.1243                 |
| MRC                   | 0.170    | 0.030                        | <0.0001                   | 0.0004                  | 0.0008                 |
| TRC                   | 0.096    | 0.009                        | 0.0231                    | 0.1192                  | 0.1639                 |

We assessed the group differences in R1, R2\*, proton density, and MTsat using t-maps containing PwPD > HCs values and six mitochondrial feature maps: CI, CII, CIV, MitoD, MRC, and TRC. After masking for finite values, n = 555 voxels were included in the analysis. For each type of analysis, we report nominal, permutation-derived, and false discovery rate (FDR)-adjusted p-values. CI, CII, CIV: mitochondrial electron transport chain protein complexes I, II, and IV. Cohen's f<sup>2</sup>: standardized effect size measure. HCs: healthy controls. MitoD: mitochondrial density. MTsat: magnetic transfer saturation. MRC: mitochondrial respiration capacity. PwPD: patients with Parkinson's disease. p<sub>FDR</sub>: false-discovery rate-adjusted p-value. p<sub>perm</sub>: non-parametric p-value derived from permutation testing. p<sub>uncorr</sub>: nominal p-value. r: correlation coefficient. R<sup>2</sup>: coefficient of determination. R1: longitudinal relaxation rate. R2\*: effective transverse relaxation rate. TRC: tissue respiration capacity.

**Supplementary Table 17. Voxel-wise spatial correlation between Parkinson's disease-related differences derived from multiparametric mapping and the six mitochondrial brain atlases features across the HybraPD atlas-derived thalamus mask.**

|                       | <b>r</b> | <b>Cohen's f<sup>2</sup></b> | <b>p<sub>uncorr</sub></b> | <b>p<sub>perm</sub></b> | <b>p<sub>FDR</sub></b> |
|-----------------------|----------|------------------------------|---------------------------|-------------------------|------------------------|
| <b>R1</b>             |          |                              |                           |                         |                        |
| CI                    | 0.085    | 0.007                        | <0.0001                   | 0.0002                  | 0.0003                 |
| CII                   | 0.102    | 0.010                        | <0.0001                   | 0.0002                  | 0.0003                 |
| CIV                   | 0.123    | 0.015                        | <0.0001                   | 0.0002                  | 0.0002                 |
| MitoD                 | 0.060    | 0.036                        | <0.0001                   | 0.0002                  | 0.0003                 |
| MRC                   | 0.102    | 0.010                        | <0.0001                   | 0.0002                  | 0.0004                 |
| TRC                   | 0.011    | 0.013                        | <0.0001                   | 0.0002                  | 0.0003                 |
| <b>R2*</b>            |          |                              |                           |                         |                        |
| CI                    | 0.020    | <0.001                       | 0.0047                    | 0.0344                  | 0.0458                 |
| CII                   | 0.004    | <0.001                       | 0.6000                    | 0.9932                  | 1.0000                 |
| CIV                   | -0.049   | 0.002                        | <0.0001                   | 0.0002                  | 0.0002                 |
| MitoD                 | -0.081   | 0.006                        | <0.0001                   | 0.0002                  | 0.0003                 |
| MRC                   | 0.008    | <0.001                       | 0.2358                    | 0.8038                  | 0.9125                 |
| TRC                   | 0.004    | <0.001                       | 0.5570                    | 0.9890                  | 1.0000                 |
| <b>Proton density</b> |          |                              |                           |                         |                        |
| CI                    | -0.054   | 0.002                        | <0.0001                   | 0.0002                  | 0.0003                 |
| CII                   | -0.181   | 0.034                        | <0.0001                   | 0.0002                  | 0.0003                 |
| CIV                   | -0.001   | <0.001                       | 0.9604                    | 1.0000                  | 1.0000                 |
| MitoD                 | -0.187   | 0.036                        | <0.0001                   | 0.0002                  | 0.0003                 |
| MRC                   | -0.007   | <0.001                       | 0.0305                    | 0.1665                  | 0.1987                 |
| TRC                   | -0.012   | <0.001                       | 0.0991                    | 0.4607                  | 0.6123                 |
| <b>MTsat</b>          |          |                              |                           |                         |                        |
| CI                    | -0.236   | 0.059                        | <0.0001                   | 0.0002                  | 0.0003                 |
| CII                   | -0.300   | 0.099                        | <0.0001                   | 0.0002                  | 0.0003                 |
| CIV                   | -0.046   | 0.002                        | <0.0001                   | 0.0002                  | 0.0002                 |
| MitoD                 | -0.329   | 0.121                        | <0.0001                   | 0.0002                  | 0.0003                 |
| MRC                   | -0.165   | 0.028                        | <0.0001                   | 0.0002                  | 0.0004                 |
| TRC                   | -0.115   | 0.013                        | <0.0001                   | 0.0002                  | 0.0003                 |

We assessed the group differences in R1, R2\*, proton density, and MTsat using t-maps containing PwPD > HCs values and six mitochondrial feature maps: CI, CII, CIV, MitoD, MRC, and TRC. After masking for finite values, n = 19,809 voxels were included in the analysis. For each type of analysis, we report nominal, permutation-derived, and false discovery rate (FDR)-adjusted p-values. CI, CII, CIV: mitochondrial electron transport chain protein complexes I, II, and IV. Cohen's f<sup>2</sup>: standardized effect size measure. HCs: healthy controls. MitoD: mitochondrial density. MTsat: magnetic transfer saturation. MRC: mitochondrial respiration capacity. PwPD: patients with Parkinson's disease. p<sub>FDR</sub>: false-discovery rate-adjusted p-value. p<sub>perm</sub>: non-parametric p-value derived from permutation testing. p<sub>uncorr</sub>: nominal p-value. r: correlation coefficient. R<sup>2</sup>: coefficient of determination. R1: longitudinal relaxation rate. R2\*: effective transverse relaxation rate. TRC: tissue respiration capacity.

**Supplementary Table 18. Voxel-wise spatial correlation between Parkinson's disease-related differences derived from multiparametric mapping and the six mitochondrial brain atlases features across the HybraPD atlas-derived intralaminar thalamic nucleus mask.**

|                       | <b>r</b> | <b>Cohen's f<sup>2</sup></b> | <b>p<sub>uncorr</sub></b> | <b>p<sub>perm</sub></b> | <b>p<sub>FDR</sub></b> |
|-----------------------|----------|------------------------------|---------------------------|-------------------------|------------------------|
| <b>R1</b>             |          |                              |                           |                         |                        |
| CI                    | 0.166    | 0.028                        | <0.0001                   | 0.0002                  | 0.0003                 |
| CII                   | 0.140    | 0.020                        | <0.0001                   | 0.0002                  | 0.0003                 |
| CIV                   | 0.203    | 0.043                        | <0.0001                   | 0.0002                  | 0.0002                 |
| MitoD                 | 0.023    | <0.001                       | 0.1391                    | 0.5867                  | 0.6454                 |
| MRC                   | 0.194    | 0.039                        | <0.0001                   | 0.0002                  | 0.0003                 |
| TRC                   | 0.204    | 0.043                        | <0.0001                   | 0.0002                  | 0.0003                 |
| <b>R2*</b>            |          |                              |                           |                         |                        |
| CI                    | -0.059   | 0.003                        | <0.0001                   | 0.0004                  | 0.0005                 |
| CII                   | -0.120   | 0.015                        | <0.0001                   | 0.0002                  | 0.0003                 |
| CIV                   | 0.028    | <0.001                       | 0.0434                    | 0.2375                  | 0.2612                 |
| MitoD                 | -0.190   | 0.037                        | <0.0001                   | 0.0002                  | 0.0002                 |
| MRC                   | 0.073    | 0.005                        | <0.0001                   | 0.0002                  | 0.0004                 |
| TRC                   | 0.061    | 0.004                        | <0.0001                   | 0.0002                  | 0.0003                 |
| <b>Proton density</b> |          |                              |                           |                         |                        |
| CI                    | 0.414    | 0.207                        | <0.0001                   | 0.0002                  | 0.0003                 |
| CII                   | 0.412    | 0.204                        | <0.0001                   | 0.0002                  | 0.0003                 |
| CIV                   | 0.185    | 0.035                        | <0.0001                   | 0.0002                  | 0.0002                 |
| MitoD                 | 0.196    | 0.040                        | <0.0001                   | 0.0002                  | 0.0003                 |
| MRC                   | 0.410    | 0.203                        | <0.0001                   | 0.0002                  | 0.0002                 |
| TRC                   | 0.298    | 0.097                        | <0.0001                   | 0.0002                  | 0.0003                 |
| <b>MTsat</b>          |          |                              |                           |                         |                        |
| CI                    | -0.017   | <0.001                       | 0.2916                    | 0.8730                  | 1.0000                 |
| CII                   | -0.104   | 0.011                        | <0.0001                   | 0.0002                  | 0.0003                 |
| CIV                   | 0.108    | 0.012                        | <0.0001                   | 0.0002                  | 0.0003                 |
| MitoD                 | -0.260   | 0.072                        | <0.0001                   | 0.0002                  | 0.0003                 |
| MRC                   | 0.047    | 0.002                        | 0.0028                    | 0.0172                  | 0.0291                 |
| TRC                   | 0.120    | 0.014                        | <0.0001                   | 0.0002                  | 0.0003                 |

We assessed the group differences in R1, R2\*, proton density, and MTsat using t-maps containing PwPD > HCs values and six mitochondrial feature maps: CI, CII, CIV, MitoD, MRC, and TRC. After masking for finite values, n = 3,980 voxels were included in the analysis. For each type of analysis, we report nominal, permutation-derived, and false discovery rate (FDR)-adjusted p-values. CI, CII, CIV: mitochondrial electron transport chain protein complexes I, II, and IV. Cohen's f<sup>2</sup>: standardized effect size measure. HCs: healthy controls. MitoD: mitochondrial density. MTsat: magnetic transfer saturation. MRC: mitochondrial respiration capacity. PwPD: patients with Parkinson's disease. p<sub>FDR</sub>: false-discovery rate-adjusted p-value. p<sub>perm</sub>: non-parametric p-value derived from permutation testing. p<sub>uncorr</sub>: nominal p-value. r: correlation coefficient. R<sup>2</sup>: coefficient of determination. R1: longitudinal relaxation rate. R2\*: effective transverse relaxation rate. TRC: tissue respiration capacity.

**Supplementary Table 19. Voxel-wise spatial correlation between Parkinson's disease-related differences derived from multiparametric mapping and the six mitochondrial brain atlases features across the HybraPD atlas-derived thalamic posterior nucleus mask.**

|                       | <b>r</b> | <b>Cohen's f<sup>2</sup></b> | <b>p<sub>uncorr</sub></b> | <b>p<sub>perm</sub></b> | <b>p<sub>FDR</sub></b> |
|-----------------------|----------|------------------------------|---------------------------|-------------------------|------------------------|
| <b>R1</b>             |          |                              |                           |                         |                        |
| CI                    | 0.040    | 0.002                        | 0.0032                    | 0.0196                  | 0.0239                 |
| CII                   | -0.022   | <0.001                       | 0.1119                    | 0.5043                  | 0.6163                 |
| CIV                   | 0.156    | 0.025                        | <0.0001                   | 0.0002                  | 0.0002                 |
| MitoD                 | -0.024   | <0.001                       | 0.0818                    | 0.3991                  | 0.4621                 |
| MRC                   | 0.107    | 0.011                        | <0.0001                   | 0.0002                  | 0.0003                 |
| TRC                   | 0.139    | 0.020                        | <0.0001                   | 0.0002                  | 0.0003                 |
| <b>R2*</b>            |          |                              |                           |                         |                        |
| CI                    | -0.080   | 0.007                        | <0.0001                   | 0.0002                  | 0.0003                 |
| CII                   | -0.060   | 0.004                        | <0.0001                   | 0.0002                  | 0.0003                 |
| CIV                   | -0.178   | 0.033                        | <0.0001                   | 0.0002                  | 0.0004                 |
| MitoD                 | -0.095   | 0.009                        | <0.0001                   | 0.0002                  | 0.0002                 |
| MRC                   | -0.159   | 0.026                        | <0.0001                   | 0.0002                  | 0.0003                 |
| TRC                   | -0.159   | 0.026                        | <0.0001                   | 0.0002                  | 0.0003                 |
| <b>Proton density</b> |          |                              |                           |                         |                        |
| CI                    | -0.117   | 0.053                        | <0.0001                   | 0.0002                  | 0.0003                 |
| CII                   | -0.192   | 0.004                        | <0.0001                   | 0.0002                  | 0.0003                 |
| CIV                   | -0.001   | 0.056                        | <0.0001                   | 0.0002                  | 0.0002                 |
| MitoD                 | -0.195   | 0.041                        | <0.0001                   | 0.0002                  | 0.0003                 |
| MRC                   | -0.045   | 0.078                        | <0.0001                   | 0.0002                  | 0.0002                 |
| TRC                   | -0.025   | 0.078                        | <0.0001                   | 0.0002                  | 0.0003                 |
| <b>MTsat</b>          |          |                              |                           |                         |                        |
| CI                    | 0.113    | 0.014                        | <0.0001                   | 0.0002                  | 0.0003                 |
| CII                   | -0.027   | 0.038                        | <0.0001                   | 0.0002                  | 0.0003                 |
| CIV                   | 0.230    | <0.001                       | 0.9189                    | 1.0000                  | 1.0000                 |
| MitoD                 | -0.264   | 0.040                        | <0.0001                   | 0.0002                  | 0.0003                 |
| MRC                   | 0.214    | 0.002                        | 0.0010                    | 0.0076                  | 0.0139                 |
| TRC                   | 0.224    | <0.001                       | 0.0704                    | 0.3519                  | 0.4554                 |

We assessed the group differences in R1, R2\*, proton density, and MTsat using t-maps containing PwPD > HCs values and six mitochondrial feature maps: CI, CII, CIV, MitoD, MRC, and TRC. After masking for finite values, n = 5,340 voxels were included in the analysis. For each type of analysis, we report nominal, permutation-derived, and false discovery rate (FDR)-adjusted p-values. CI, CII, CIV: mitochondrial electron transport chain protein complexes I, II, and IV. Cohen's f<sup>2</sup>: standardized effect size measure. HCs: healthy controls. MitoD: mitochondrial density. MTsat: magnetic transfer saturation. MRC: mitochondrial respiration capacity. PwPD: patients with Parkinson's disease. p<sub>FDR</sub>: false-discovery rate-adjusted p-value. p<sub>perm</sub>: non-parametric p-value derived from permutation testing. p<sub>uncorr</sub>: nominal p-value. r: correlation coefficient. R<sup>2</sup>: coefficient of determination. R1: longitudinal relaxation rate. R2\*: effective transverse relaxation rate. TRC: tissue respiration capacity.

**Supplementary Table 20. Voxel-wise spatial correlation between Parkinson's disease-related differences derived from multiparametric mapping and the six mitochondrial brain atlases features across the HybraPD atlas-derived thalamic ventral nucleus mask.**

|                       | <b>r</b> | <b>Cohen's f<sup>2</sup></b> | <b>p<sub>uncorr</sub></b> | <b>p<sub>perm</sub></b> | <b>p<sub>FDR</sub></b> |
|-----------------------|----------|------------------------------|---------------------------|-------------------------|------------------------|
| <b>R1</b>             |          |                              |                           |                         |                        |
| CI                    | -0.013   | <0.001                       | 0.2259                    | 0.7764                  | 0.8530                 |
| CII                   | 0.086    | 0.007                        | <0.0001                   | 0.0002                  | 0.0003                 |
| CIV                   | 0.070    | 0.005                        | <0.0001                   | 0.0002                  | 0.0003                 |
| MitoD                 | 0.103    | 0.011                        | <0.0001                   | 0.0002                  | 0.0002                 |
| MRC                   | -0.008   | <0.001                       | 0.4730                    | 0.9794                  | 1.0000                 |
| TRC                   | 0.033    | 0.001                        | 0.0023                    | 0.0112                  | 0.1449                 |
| <b>R2*</b>            |          |                              |                           |                         |                        |
| CI                    | 0.132    | 0.018                        | <0.0001                   | 0.0002                  | 0.0003                 |
| CII                   | 0.089    | 0.008                        | <0.0001                   | 0.0002                  | 0.0003                 |
| CIV                   | 0.005    | <0.001                       | 0.6298                    | 0.9970                  | 0.9970                 |
| MitoD                 | -0.058   | 0.003                        | <0.0001                   | 0.0002                  | 0.0002                 |
| MRC                   | 0.094    | 0.009                        | <0.0001                   | 0.0002                  | 0.0003                 |
| TRC                   | 0.096    | 0.009                        | <0.0001                   | 0.0002                  | 0.0003                 |
| <b>Proton density</b> |          |                              |                           |                         |                        |
| CI                    | -0.168   | 0.029                        | <0.0001                   | 0.0002                  | 0.0003                 |
| CII                   | -0.237   | 0.059                        | <0.0001                   | 0.0002                  | 0.0003                 |
| CIV                   | -0.132   | 0.018                        | <0.0001                   | 0.0002                  | 0.0002                 |
| MitoD                 | -0.035   | 0.001                        | 0.0015                    | 0.0102                  | 0.0149                 |
| MRC                   | -0.157   | 0.025                        | <0.0001                   | 0.0002                  | 0.0003                 |
| TRC                   | -0.175   | 0.032                        | <0.0001                   | 0.0002                  | 0.0003                 |
| <b>MTsat</b>          |          |                              |                           |                         |                        |
| CI                    | -0.324   | 0.117                        | <0.0001                   | 0.0002                  | 0.0003                 |
| CII                   | -0.277   | 0.083                        | <0.0001                   | 0.0002                  | 0.0003                 |
| CIV                   | -0.147   | 0.022                        | <0.0001                   | 0.0002                  | 0.0003                 |
| MitoD                 | -0.093   | 0.009                        | <0.0001                   | 0.0002                  | 0.0003                 |
| MRC                   | -0.277   | 0.083                        | <0.0001                   | 0.0002                  | 0.0004                 |
| TRC                   | -0.252   | 0.068                        | <0.0001                   | 0.0002                  | 0.0003                 |

We assessed the group differences in R1, R2\*, proton density, and MTsat using t-maps containing PwPD > HCs values and six mitochondrial feature maps: CI, CII, CIV, MitoD, MRC, and TRC. After masking for finite values, n = 8,260 voxels were included in the analysis. For each type of analysis, we report nominal, permutation-derived, and false discovery rate (FDR)-adjusted p-values. CI, CII, CIV: mitochondrial electron transport chain protein complexes I, II, and IV. Cohen's f<sup>2</sup>: standardized effect size measure. HCs: healthy controls. MitoD: mitochondrial density. MTsat: magnetic transfer saturation. MRC: mitochondrial respiration capacity. PwPD: patients with Parkinson's disease. p<sub>FDR</sub>: false-discovery rate-adjusted p-value. p<sub>perm</sub>: non-parametric p-value derived from permutation testing. p<sub>uncorr</sub>: nominal p-value. r: correlation coefficient. R<sup>2</sup>: coefficient of determination. R1: longitudinal relaxation rate. R2\*: effective transverse relaxation rate. TRC: tissue respiration capacity.

**Supplementary Table 21. Voxel-wise spatial correlation between Parkinson's disease-related differences derived from multiparametric mapping and the six mitochondrial brain atlases features across the HybraPD atlas-derived anterior thalamic nucleus mask.**

|                       | <b>r</b> | <b>Cohen's f<sup>2</sup></b> | <b>p<sub>uncorr</sub></b> | <b>p<sub>perm</sub></b> | <b>p<sub>FDR</sub></b> |
|-----------------------|----------|------------------------------|---------------------------|-------------------------|------------------------|
| <b>R1</b>             |          |                              |                           |                         |                        |
| CI                    | 0.033    | 0.001                        | 0.3072                    | 0.8874                  | 0.9760                 |
| CII                   | 0.078    | 0.006                        | 0.0148                    | 0.0834                  | 0.1147                 |
| CIV                   | 0.016    | <0.001                       | 0.6131                    | 0.9968                  | 0.9968                 |
| MitoD                 | -0.003   | <0.001                       | 0.9230                    | 1.0000                  | 1.0000                 |
| MRC                   | 0.049    | 0.002                        | 0.1266                    | 0.5613                  | 0.5613                 |
| TRC                   | 0.105    | 0.011                        | 0.0011                    | 0.0064                  | 0.0082                 |
| <b>R2*</b>            |          |                              |                           |                         |                        |
| CI                    | 0.132    | 0.018                        | <0.0001                   | 0.0002                  | 0.0003                 |
| CII                   | 0.136    | 0.019                        | <0.0001                   | 0.0002                  | 0.0003                 |
| CIV                   | 0.072    | 0.005                        | 0.0237                    | 0.1298                  | 0.1503                 |
| MitoD                 | 0.162    | 0.027                        | <0.0001                   | 0.0002                  | 0.0002                 |
| MRC                   | 0.084    | 0.007                        | 0.0090                    | 0.0500                  | 0.0733                 |
| TRC                   | 0.064    | 0.004                        | 0.0481                    | 0.2525                  | 0.3086                 |
| <b>Proton density</b> |          |                              |                           |                         |                        |
| CI                    | 0.144    | 0.021                        | <0.0001                   | 0.0002                  | 0.0003                 |
| CII                   | 0.069    | 0.005                        | 0.0308                    | 0.1626                  | 0.1987                 |
| CIV                   | 0.154    | 0.024                        | <0.0001                   | 0.0002                  | 0.0003                 |
| MitoD                 | 0.015    | <0.001                       | 0.6381                    | 0.9980                  | 1.0000                 |
| MRC                   | 0.159    | 0.026                        | <0.0001                   | 0.0002                  | 0.0003                 |
| TRC                   | 0.135    | 0.019                        | <0.0001                   | 0.0002                  | 0.0003                 |
| <b>MTsat</b>          |          |                              |                           |                         |                        |
| CI                    | -0.055   | 0.003                        | 0.0888                    | 0.4219                  | 0.0003                 |
| CII                   | 0.087    | 0.008                        | 0.0066                    | 0.0408                  | 0.4885                 |
| CIV                   | <0.001   | <0.001                       | 0.9904                    | 1.0000                  | 0.0499                 |
| MitoD                 | -0.140   | 0.020                        | <0.0001                   | 0.0002                  | 1.0000                 |
| MRC                   | 0.032    | 0.001                        | 0.3261                    | 0.9048                  | 0.9966                 |
| TRC                   | 0.116    | 0.014                        | 0.0003                    | 0.0008                  | 0.0012                 |

We assessed the group differences in R1, R2\*, proton density, and MTsat using t-maps containing PwPD > HCs values and six mitochondrial feature maps: CI, CII, CIV, MitoD, MRC, and TRC. After masking for finite values, n = 965 voxels were included in the analysis. For each type of analysis, we report nominal, permutation-derived, and false discovery rate (FDR)-adjusted p-values. CI, CII, CIV: mitochondrial electron transport chain protein complexes I, II, and IV. Cohen's f<sup>2</sup>: standardized effect size measure. HCs: healthy controls. MitoD: mitochondrial density. MTsat: magnetic transfer saturation. MRC: mitochondrial respiration capacity. PwPD: patients with Parkinson's disease. p<sub>FDR</sub>: false-discovery rate-adjusted p-value. p<sub>perm</sub>: non-parametric p-value derived from permutation testing. p<sub>uncorr</sub>: nominal p-value. r: correlation coefficient. R<sup>2</sup>: coefficient of determination. R1: longitudinal relaxation rate. R2\*: effective transverse relaxation rate. TRC: tissue respiration capacity.

**Supplementary Table 22. Voxel-wise spatial correlation between Parkinson's disease-related differences derived from multiparametric mapping and the six mitochondrial brain atlases features across the HybraPD atlas-derived medial thalamic nucleus mask.**

|                       | <b>r</b> | <b>Cohen's f<sup>2</sup></b> | <b>p<sub>uncorr</sub></b> | <b>p<sub>perm</sub></b> | <b>p<sub>FDR</sub></b> |
|-----------------------|----------|------------------------------|---------------------------|-------------------------|------------------------|
| <b>R1</b>             |          |                              |                           |                         |                        |
| CI                    | 0.259    | 0.072                        | <0.0001                   | 0.0002                  | 0.0003                 |
| CII                   | 0.225    | 0.054                        | <0.0001                   | 0.0002                  | 0.0003                 |
| CIV                   | 0.175    | 0.032                        | <0.0001                   | 0.0002                  | 0.0002                 |
| MitoD                 | 0.091    | 0.008                        | <0.0001                   | 0.0002                  | 0.0003                 |
| MRC                   | 0.238    | 0.060                        | <0.0001                   | 0.0002                  | 0.0003                 |
| TRC                   | 0.192    | 0.038                        | <0.0001                   | 0.0002                  | 0.0003                 |
| <b>R2*</b>            |          |                              |                           |                         |                        |
| CI                    | -0.060   | 0.004                        | 0.0001                    | 0.0004                  | 0.0003                 |
| CII                   | -0.031   | 0.001                        | 0.0506                    | 0.2691                  | 0.3700                 |
| CIV                   | -0.082   | 0.007                        | <0.0001                   | 0.0002                  | 0.0004                 |
| MitoD                 | -0.126   | 0.016                        | <0.0001                   | 0.0002                  | 0.0002                 |
| MRC                   | 0.022    | <0.001                       | 0.1579                    | 0.6369                  | 0.6369                 |
| TRC                   | -0.015   | <0.001                       | 0.3450                    | 0.9214                  | 0.9652                 |
| <b>Proton density</b> |          |                              |                           |                         |                        |
| CI                    | 0.225    | 0.053                        | <0.0001                   | 0.0002                  | 0.0003                 |
| CII                   | 0.063    | 0.004                        | <0.0001                   | 0.0002                  | 0.0003                 |
| CIV                   | 0.229    | 0.056                        | <0.0001                   | 0.0002                  | 0.0002                 |
| MitoD                 | -0.198   | 0.041                        | <0.0001                   | 0.0002                  | 0.0003                 |
| MRC                   | 0.269    | 0.078                        | <0.0001                   | 0.0002                  | 0.0002                 |
| TRC                   | 0.270    | 0.078                        | <0.0001                   | 0.0002                  | 0.0003                 |
| <b>MTsat</b>          |          |                              |                           |                         |                        |
| CI                    | 0.113    | 0.013                        | <0.0001                   | 0.0002                  | 0.0003                 |
| CII                   | -0.027   | <0.001                       | 0.0502                    | 0.2697                  | 0.3490                 |
| CIV                   | 0.230    | 0.056                        | <0.0001                   | 0.0002                  | 0.0003                 |
| MitoD                 | -0.264   | 0.075                        | <0.0001                   | 0.0002                  | 0.0003                 |
| MRC                   | 0.214    | 0.048                        | <0.0001                   | 0.0002                  | 0.0004                 |
| TRC                   | 0.224    | 0.053                        | <0.0001                   | 0.0002                  | 0.0003                 |

We assessed the group differences in R1, R2\*, proton density, and MTsat using t-maps containing PwPD > HCs values and six mitochondrial feature maps: CI, CII, CIV, MitoD, MRC, and TRC. After masking for finite values, n = 5,110 voxels were included in the analysis. For each type of analysis, we report nominal, permutation-derived, and false discovery rate (FDR)-adjusted p-values. CI, CII, CIV: mitochondrial electron transport chain protein complexes I, II, and IV. Cohen's f<sup>2</sup>: standardized effect size measure. HCs: healthy controls. MitoD: mitochondrial density. MTsat: magnetic transfer saturation. MRC: mitochondrial respiration capacity. PwPD: patients with Parkinson's disease. p<sub>FDR</sub>: false-discovery rate-adjusted p-value. p<sub>perm</sub>: non-parametric p-value derived from permutation testing. p<sub>uncorr</sub>: nominal p-value. r: correlation coefficient. R<sup>2</sup>: coefficient of determination. R1: longitudinal relaxation rate. R2\*: effective transverse relaxation rate. TRC: tissue respiration capacity.
